# Supplementary material for: Correspondence between the Compositional and Aromatic Diversity of Leaf and Fruit Essential Oils and the Pomological Diversity of 43 Sweet Oranges (Citrus x aurantium var sinensis L.)
Source: MDPI journal article supplement (doi:10.3390/plants12050990), 2023-02-21
Supplement: s1 [file s1]

**Supplemental S1 Table:** Names of cultivars used in this study as well as their coded identifiers and phenotypic groups.

| <b>Cultivar</b>          | <b>Id</b> | <b>Group</b> |
|--------------------------|-----------|--------------|
| Bisri                    | SRA 390   | blond        |
| Cadenera                 | SRA 232   | blond        |
| Cam Mat                  | SRA 811   | blond        |
| Fukuhara                 | SRA 562   | blond        |
| Hamlin                   | SRA 41    | blond        |
| Huan Pi Chen             | SRA 567   | blond        |
| Lue Gim Gong             | SRA 397   | blond        |
| Madame Vinous            | SRA 551   | blond        |
| Maltaise Blonde          | SRA 560   | blond        |
| Natal                    | SRA 398   | blond        |
| Parson Brown             | SRA 43    | blond        |
| Pera                     | SRA 399   | blond        |
| Pinneapple               | SRA 42    | blond        |
| Portugaise               | SRA 400   | blond        |
| Quintela                 | SRA 659   | blond        |
| Ruby                     | SRA 402   | blond        |
| Salustiana               | SRA 486   | blond        |
| Salustiana SG            | SRA 403   | blond        |
| Shamouti                 | SRA 299   | blond        |
| Sweet                    | SRA 50    | blond        |
| Valencia Late SG         | SRA 246   | blond        |
| Boukhobza                | SRA 569   | blood        |
| Maltaise demi blood      | SRA 703   | blood        |
| Maltaise demi blood SG   | SRA 237   | blood        |
| Moro SG                  | SRA 301   | blood        |
| Petit Pierre demi blood  | SRA 570   | blood        |
| Blood                    | SRA 545   | blood        |
| Bloodlli                 | SRA 243   | blood        |
| Bloodllo                 | SRA 406   | blood        |
| Bloodllo Moscata Cuscuna | SRA 405   | blood        |

---

|                     |         |          |
|---------------------|---------|----------|
| Sokotoro            | SRA 407 | blood    |
| Tarocco             | SRA 573 | blood    |
| Tarocco Chelif      | SRA 539 | blood    |
| Tarocco Rosso       | SRA 574 | blood    |
| Cara Cara Navel     | SRA 666 | navel    |
| Fisher Navel        | SRA 669 | navel    |
| Navelate            | SRA 307 | navel    |
| Navelina            | SRA 672 | navel    |
| Navelina SG         | SRA 305 | navel    |
| Washington Navel    | SRA 39  | navel    |
| Washington Navel SG | SRA 217 | navel    |
| Iaffaoui Douce      | SRA 660 | acidless |
| Sakkaria Lokum      | SRA 678 | acidless |

---
